# Supplementary material
Source: HighWire-hosted journal article supplement (doi:10.1101/rna.062695.117)
Supplement: Supplemental_Dataset1.xlsx [file Supplemental_Dataset1.xlsx]

## Sheet: RSAF
Sample	Group	Residue Number	WT_ITS1-239_NOC4_1	Noc4-TAP	Utp30-TAP	Δutp30/Noc4-TAP
SpC of references			344	408	583	274
90S RSAF			53.66	62.65	64.33	45.04
Pre40S RSAF			3.02	4.5	5.62	2.47
Pre60S RSAF			0.59	9.54	31.61	4.93
RPS RSAF			21.31	30.19	16.85	26.74
RPL RSAF			12.11	18.19	22.33	21.63
Total RSAF			90.18	134.57	185.97	118.29
% of 90S AFs			59.51	47.35	35.88	38.58
UTP9	90S-UTPA	575	1.75	1.29	1.18	0.95
NAN1	90S-UTPA	896	0.89	1.32	0.91	0.88
UTP15	90S-UTPA	513	1.06	1	1.27	1.13
UTP4	90S-UTPA	776	0.88	1.22	0.86	0.89
UTP8	90S-UTPA	713	0.8	1.01	0.84	0.84
UTP5	90S-UTPA	643	0.95	0.78	1.1	0.83
UTP10	90S-UTPA	1769	0.89	0.81	0.93	0.63
UTP21	90S-UTPB	939	0.93	1.05	0.82	0.89
UTP6	90S-UTPB	440	1.93	1.73	1.72	1.68
PWP2	90S-UTPB	923	0.59	0.77	0.8	0.8
DIP2	90S-UTPB	943	1.19	0.89	1.18	0.96
UTP13	90S-UTPB	817	0.78	0.97	0.93	0.91
UTP18	90S-UTPB	594	0.58	0.59	0.55	0.76
NOP1	90S-U3	327	1.94	2.36	3.21	1.63
NOP56	90S-U3	504	1.61	1.73	2.31	1.34
NOP58	90S-U3	511	1.12	1.19	1.39	0.91
SNU13	90S-U3	126	1.81	0.52	0.18	0.51
RRP9	90S-U3	573	0.75	0.93	0.91	0.76
BUD21	90S-5ETS	214	0.77	1.22	0.86	0.53
UTP7	90S-5ETS	554	1.35	1.14	0.82	0.76
UTP11	90S-5ETS	250	1.52	1.48	1.01	0.97
MPP10	90S-MPP10	593	1.09	1.6	1.11	0.87
IMP3	90S-MPP10	183	1.6	1.49	1.59	1.23
IMP4	90S-MPP10	290	1.18	1.46	1.35	1.17
SAS10	90S-5ETS	610	0.96	1.11	0.73	0.42
SOF1	90S-5ETS	489	1.25	1.05	1.42	0.92
FCF2	90S-5ETS	217	2.17	1.86	1.23	0.67
FCF1	90S-5ETS	189	0.2	0.4	0.65	0.51
EFG1	90S-5	233	0.33	0.37	0.59	0.14
BUD22	90S-5=	519	0	0.1	0.18	0.12
ENP2	90S-5	707	0.56	0.77	0.79	0.32
BFR2	90S-5	534	0.98	1.22	0.99	0.6
LCP5	90S-5	357	0.71	1.19	0.77	0.27
ESF2	90S-5=	316	0	0.34	0.41	0.05
HCA4	90S-5= Hel	770	0.03	0.37	0.71	0.21
ESF1	90S-5=	628	0.04	0.45	0.46	0.1
KRR1	90S-C	316	0.76	1.41	1.04	0.87
KRI1	90S-C=	591	0	0.06	0.18	0.22
UTP23	90S-C=	254	0	0	0.33	0.06
CBF5	90S-C= HACA	483	0	0.14	1.17	0.87
NHP2	90S-C= HACA	156	0	0.14	0.69	0.72
NOP10	90S-C= HACA	58	0	0	0	1.39
GAR1	90S-C= HACA	205	0.06	0.16	0.75	0.16
RRP5	90S-C	1729	0.54	0.99	1.03	0.73
UTP22	90S-C	1237	0.72	1.06	1	0.82
RRP7	90S-C	297	0.73	1.03	0.98	0.65
ROK1	90S-C Hel	564	0.56	0.83	0.8	0.17
NSR1	90S-C=	414	0	0	0.74	0.27
MRD1	90S-C=	887	0	0	0.1	0
NOP9	90S-C=	666	0	0	0.11	0
EMG1	90S-3	252	2.47	2.07	1.64	1.73
NOP6	90S-3=	225	0	0	0.27	0.21
UTP30	90S-late	274	1.58	1.35	1.17	0
BMS1	90S-late	1183	1.06	1.02	0.8	0.74
RCL1	90S-late	367	0.9	1.22	1	0.88
KRE33	90S-late	1056	1.05	1.42	1.37	0.91
NOP14	90S-late	810	0.96	1.25	0.83	1.15
NOC4	90S-late	552	0.99	1.87	0.94	0.67
UTP20	90S-late	2493	0.57	0.67	0.71	0.59
UTP14	90S-late	899	0.79	1.33	0.84	0.5
ENP1	90S-late/pre40S	483	1.45	1.37	1.27	0.57
PNO1	90S-late/pre40S	274	1.11	1.19	0.92	0.65
RRP12	90S-late/pre40S	1228	0.47	0.85	0.8	0.64
RRT14	90S-late	206	1.17	0.9	0.63	0.39
FAF1	90S-late	346	0.48	0.6	0.38	0.19
ECM16	90S Hel	1267	0	0.69	0.6	0.51
RRP3	90S Hel	501	0	0.35	0.92	0.13
DBP8	90S Hel	431	0	0.4	0.59	0.07
PRP43	90S/60S Hel	767	0	0.03	0.82	0.04
DHR2	90S Hel	735	0	0	0.09	0
FAL1	90S Hel	399	0	0	0.1	0.04
MTR4	Exosome	1073	0	0.19	0.43	0.42
CSL4	Exosome	292	0	0.37	0.34	0.55
RRP4	Exosome	359	0	0.45	0.49	0.76
RRP40	Exosome	240	0	0.18	0.38	0.6
SKI6	Exosome	246	0	0.35	0.47	0.52
RRP42	Exosome	265	0	0.21	0.35	0.12
RRP43	Exosome	394	0	0.22	0.39	0.41
RRP45	Exosome	305	0	0.29	0.35	0.48
RRP46	Exosome	223	0	0.2	0.31	0.29
MTR3	Exosome	250	0	0.04	0.34	0.19
DIS3	Exosome	1001	0	0.22	0.41	0.61
RRP6	Exosome	733	0	0.22	0.4	0.57
LRP1	Exosome	184	0	0.65	0.71	0.18
POP1	RNase MRP	875	0	0.07	0.31	0.18
POP3	RNase MRP	195	0	0.11	0.39	0.08
POP4	RNase MRP	279	0	0.12	0.63	0
POP5	RNase MRP	173	0	0.31	0.09	0.19
POP6	RNase MRP	158	0	0.14	0.05	0
POP7	RNase MRP	140	0	0.08	0.27	0
POP8	RNase MRP	133	0	0.08	0	0
RPP1	RNase MRP	293	0	0.33	0.65	0.27
RMP1	RNase MRP	201	0	0.05	0.23	0.08
SNM1	RNase MRP	198	0	0.11	0.46	0
SGD1	90S-minor	899	0	0.24	0.48	0.11
CMS1	90S-minor	291	0.04	0.19	0.39	0.11
UTP25	90S-minor	721	0	0.05	0.27	0.13
RRP36	90S-minor	300	0	0	0.05	0
YGR251W	90S-minor	196	0	0	0.08	0
FYV7	90S-minor	151	0	0	0.05	0
PXR1	90S-minor	271	0	0	0.62	0
BUD23	90S-minor	275	0	0	0.03	0
SLX9	90S-minor	210	0	0.41	0.07	0.08
DIM1	pre40S	318	0	0.34	0.7	0.25
NOB1	pre40S	459	0	0.31	0.68	0.25
LTV1	pre40S	463	0	0	0.13	0
TSR1	pre40S	788	0	0	0.39	0.02
RIO2	pre40S	425	0	0	0.4	0
HRR25	pre40S	494	0	0	0.03	0
RPS0A	RPS	252	0.1	1.43	0.43	0.26
RPS1A	RPS	255	1.05	1.79	1.53	1.07
RPS2	RPS	254	0	0.09	0.72	0.51
RPS3	RPS	240	0.11	0.41	1.31	0.81
RPS4A	RPS	261	2.04	2.08	1.61	1.36
RPS5	RPS	225	1.36	1.5	1.39	1.15
RPS6A	RPS	236	1.02	1.11	1.49	1.36
RPS7A	RPS	190	1.27	1.32	1.41	0.93
RPS8A	RPS	200	0.83	1.14	0.84	1.13
RPS9A	RPS	197	1.42	2.18	1.26	1.24
RPS10A	RPS	105	0	0	0.07	0.15
RPS11A	RPS	156	0.73	0.77	1.08	0.93
RPS12	RPS	143	0.44	1.29	0.32	1.35
RPS13	RPS	151	0.67	1.3	0.3	0.85
RPS14A	RPS	137	1.38	1.43	0.06	1.06
RPS15	RPS	142	0.18	0.54	0.22	0.34
RPS16A	RPS	143	1.42	1.83	0.21	1.35
RPS17A	RPS	136	1.31	1.68	0.06	1.18
RPS18A	RPS	146	2	1.79	0.1	1.65
RPS19A	RPS	144	0.53	0.98	0.27	0.89
RPS20	RPS	121	0	0.18	0.82	0.8
RPS21A	RPS	87	0	0	0	0.56
RPS22A	RPS	130	0.88	1.42	0.12	1.11
RPS23A	RPS	145	0.18	0.45	0.32	0.67
RPS24A	RPS	135	1.04	1.61	0	0.48
RPS25A	RPS	108	0.24	0.81	0	0.89
RPS26A	RPS	119	0.21	0.18	0	0.41
RPS27A	RPS	82	0.15	0.13	0	0
RPS28A	RPS	67	0.76	0	0	0.96
RPS30A	RPS	63	0	0.69	0	0
RPS31	RPS	152	0	0.07	0	0.64
ASC1	RPS	319	0	0	0.91	0.66
RPL1A	RPL	217	0	0.15	1.02	0.37
RPL2A	RPL	254	0.45	0.34	1.08	0.44
RPL3	RPL	387	0.2	0.45	1.6	0.92
RPL4A	RPL	362	0.74	0.42	0.95	0.76
RPL5	RPL	297	0	0.29	1.03	0.27
RPL6A	RPL	176	0.51	0.37	1.35	0.46
RPL7A	RPL	244	0.62	0.36	1.54	0.79
RPL8A	RPL	256	0.25	1.4	1.23	1.07
RPL9A	RPL	191	0	0.17	0.64	0.42
RPL10	RPL	221	0.34	0.3	1.11	0.73
RPL11A	RPL	174	0.07	0.38	0.7	0.46
RPL12A	RPL	165	0	0.26	0.74	0.88
RPL13A	RPL	199	0.77	0.88	1.12	0.81
RPL14A	RPL	138	0.46	0.32	0.06	0.35
RPL15A	RPL	204	0	0.59	0.75	0.71
RPL16A	RPL	199	0.45	0.33	1.16	0.73
RPL17A	RPL	184	0.83	0.71	0.67	0.61
RPL18A	RPL	186	0	0.59	0.99	0.69
RPL19A	RPL	189	0.6	0.63	0.93	0.68
RPL20A	RPL	172	0.66	0.57	1.16	0.66
RPL21A	RPL	160	0.32	0.27	0.67	0.2
RPL22A	RPL	121	0	0.63	0	0.27
RPL23A	RPL	137	0	0.08	0.06	0.24
RPL24A	RPL	155	0.25	0.14	0.4	0.31
RPL25	RPL	142	0.18	0.15	0.32	0.23
RPL26A	RPL	127	0.3	1.29	0	0.51
RPL27A	RPL	136	0.19	0.64	0.11	0.83
RPL28	RPL	149	0.09	0.37	0.05	0.32
RPL29	RPL	59	0	0	0	0.27
RPL30	RPL	105	0	0.21	0.15	0.77
RPL31A	RPL	113	0.34	0.96	0	0.57
RPL32	RPL	130	0.49	0.67	0	0.62
RPL33A	RPL	107	0.24	0.2	0	0.15
RPL34A	RPL	121	0.1	0.09	0	0.27
RPL35A	RPL	120	0.95	0.54	0	0.54
RPL36A	RPL	100	1.02	0.76	0	0.97
RPL37A	RPL	88	0.43	0.49	0	0.18
RPL38	RPL	78	0	0.14	0	0.21
RPL42A	RPL	106	0	0	0	0.15
RPL43A	RPL	92	0.28	0.47	0	0.53
RPP0	RPL	312	0	0.17	0.69	0.26
RPP1A	RPL	106	0	0.21	0	0.15
RPP2A	RPL	106	0	0.2	0.07	0.29
RRP5	pre60S D1/90S	1729	0.54	0.99	1.03	0.73
NOC2	pre60S D1	710	0	0.4	0.65	0.07
MAK21	pre60S D1	1025	0	0.33	0.75	0.03
PWP1	pre60S D1	576	0	0.11	0.37	0.03
NOP12	pre60S D1	459	0	0.57	1.3	0.25
BRX1	pre60S D1	291	0	0.3	0.92	0.17
EBP2	pre60S D1	427	0	0.33	0.61	0.11
ERB1	pre60S D1	807	0	0.26	0.66	0.14
YTM1	pre60S D1	460	0	0.28	1.01	0.35
NOP7	pre60S D1	605	0	0.31	0.66	0.08
CIC1	pre60S D1	376	0	0.69	1.12	0.26
HAS1	pre60S D1	505	0.05	0.82	1.97	0.96
RLP7	pre60S D1	322	0	0.34	0.67	0.05
NOP15	pre60S D1	220	0	0.1	0.24	0
NOP16	pre60S D1	231	0	0.38	0.8	0
MRT4	pre60S D2	236	0	0.46	1.2	0.2
RPF1	pre60S D2	295	0	0.04	0.34	0.05
MAK16	pre60S D2	306	0	0.21	0.33	0
NSA1	pre60S D2	463	0	0	0.48	0
NOP4	pre60S D2	685	0	0.21	0.59	0.07
RRP1	pre60S D2	278	0	0.23	0.63	0.06
DRS1	pre60S D3	752	0	0	0.28	0.04
PUF6	pre60S D4	656	0	0.05	0.49	0
NIP7	pre60S D5	181	0	0.18	1.01	0
NOP2	pre60S D5	618	0	0.07	0.58	0.03
FPR3	pre60S D5	411	0	0.16	0.61	0.43
FPR4	pre60S D5	392	0	0.19	0.7	0.16
RPF2	pre60S D5	344	0	0.06	0.49	0
RRS1	pre60S D5	203	0	0	0.3	0
LOC1	pre60S D5	204	0	0.27	0.49	0
TIF6	pre60S D6	245	0	0.13	0.25	0
RLP24	pre60S D6	199	0	0.05	0.38	0
NOG1	pre60S D6	647	0	0	0.57	0
NOP53	pre60S D6	455	0	0	0.05	0
MAK11	pre60S	468	0	0.02	0.64	0
DBP10	pre60S	995	0	0	0.08	0
SSF1	pre60S	453	0	0.12	0.74	0.04
SSF2	pre60S	453	0	0	0.57	0
RRP15	pre60S	250	0	0.17	0.37	0
RRP14	pre60S	434	0	0	0.07	0
DBP9	pre60S	594	0	0.05	0.62	0
DBP7	pre60S	742	0	0	0.28	0
RRB1	pre60S	511	0	0	0.27	0.09
NUG1	pre60S	520	0	0	0.24	0
NSA2	pre60S	261	0	0	0.23	0
NOG2	pre60S	486	0	0	0.11	0
RIX1	pre60S	763	0	0	0.04	0
IPI1	pre60S	334	0	0.03	0.02	0
IPI3	pre60S	555	0	0	0.01	0
NOC3	pre60S	663	0	0	0.08	0
SPB1	pre60S	841	0	0	0.06	0
ARX1	pre60S	593	0	0	0.03	0
ALB1	pre60S	175	0	0	0.04	0
GRC3	pre60S	632	0	0	0.01	0
TMA16	pre60S	178	0	0	0.09	0
LSG1	pre60S	640	0	0	0.04	0
URB1	pre60S minor	1764	0	0.01	0.29	0.03
URB2	pre60S minor	1174	0	0	0.19	0
NOP8	pre60S minor	484	0	0	0.46	0
RSA3	pre60S minor	220	0	0	0.14	0
DBP6	pre60S minor	629	0	0	0.37	0
MAK5	pre60S minor	773	0	0.01	0.38	0.02
DBP2	pre60S minor	546	0	0	0.04	0
DBP3	pre60S minor	523	0	0	0.47	0
KEM1	pre60S minor	1528	0	0	0.24	0.04
RRP17	pre60S minor	235	0	0	0.03	0
REX4	pre60S minor	289	0	0.23	0.56	0
RRP8	pre60S minor	392	0	0.33	0.57	0.33
JIP5	pre60S minor	492	0	0	0.12	0
NOP13	pre60S minor	403	0	0.03	0.49	0.12
YIL096C	pre60S minor	336	0	0	0.07	0

## Sheet: SCPHR
Sample	Group	Residue Number	WT_ITS1-239_NOC4_1	Noc4-TAP	Utp30-TAP	Δutp30/Noc4-TAP
SpC of references			344	408	583	274
90S SCPHR			422.42	575.65	840.52	279.71
Pre40S SCPHR			23.81	41.35	73.38	15.32
Pre60S SCPHR			4.62	87.7	413	30.63
RPS SCPHR			167.76	277.43	220.18	166.07
RPL SCPHR			95.37	167.13	291.79	134.3
Total SCPHR			709.88	1236.46	2429.81	734.54
% of 90S AF			59.51	47.35	35.88	38.58
UTP9	90S-UTPA	575	13.74	11.83	15.48	5.91
NAN1	90S-UTPA	896	7.03	12.17	11.83	5.47
UTP15	90S-UTPA	513	8.38	9.16	16.57	7.02
UTP4	90S-UTPA	776	6.96	11.21	11.21	5.54
UTP8	90S-UTPA	713	6.31	9.26	10.94	5.19
UTP5	90S-UTPA	643	7.47	7.15	14.31	5.13
UTP10	90S-UTPA	1769	7.01	7.46	12.1	3.9
UTP21	90S-UTPB	939	7.35	9.69	10.65	5.54
UTP6	90S-UTPB	440	15.23	15.91	22.5	10.45
PWP2	90S-UTPB	923	4.66	7.04	10.51	4.98
DIP2	90S-UTPB	943	9.33	8.17	15.38	5.94
UTP13	90S-UTPB	817	6.12	8.94	12.12	5.63
UTP18	90S-UTPB	594	4.55	5.39	7.24	4.71
NOP1	90S-U3	327	15.29	21.71	41.9	10.09
NOP56	90S-U3	504	12.7	15.87	30.16	8.33
NOP58	90S-U3	511	8.81	10.96	18.2	5.68
SNU13	90S-U3	126	14.29	4.76	2.38	3.17
RRP9	90S-U3	573	5.93	8.55	11.87	4.71
BUD21	90S-5ETS	214	6.07	11.21	11.21	3.27
UTP7	90S-5ETS	554	10.65	10.47	10.65	4.69
UTP11	90S-5ETS	250	12	13.6	13.2	6
MPP10	90S-MPP10	593	8.6	14.67	14.5	5.4
IMP3	90S-MPP10	183	12.57	13.66	20.77	7.65
IMP4	90S-MPP10	290	9.31	13.45	17.59	7.24
SAS10	90S-5ETS	610	7.54	10.16	9.51	2.62
SOF1	90S-5ETS	489	9.82	9.61	18.61	5.73
FCF2	90S-5ETS	217	17.05	17.05	16.13	4.15
FCF1	90S-5ETS	189	1.59	3.7	8.47	3.17
EFG1	90S-5	233	2.58	3.43	7.73	0.86
BUD22	90S-5=	519	0	0.96	2.31	0.77
ENP2	90S-5	707	4.38	7.07	10.33	1.98
BFR2	90S-5	534	7.68	11.24	12.92	3.75
LCP5	90S-5	357	5.6	10.92	10.08	1.68
ESF2	90S-5=	316	0	3.16	5.38	0.32
HCA4	90S-5= Hel	770	0.26	3.38	9.22	1.3
ESF1	90S-5=	628	0.32	4.14	6.05	0.64
KRR1	90S-C	316	6.01	12.97	13.61	5.38
KRI1	90S-C=	591	0	0.51	2.37	1.35
UTP23	90S-C=	254	0	0	4.33	0.39
CBF5	90S-C= HACA	483	0	1.24	15.32	5.38
NHP2	90S-C= HACA	156	0	1.28	8.97	4.49
NOP10	90S-C= HACA	58	0	0	0	8.62
GAR1	90S-C= HACA	205	0.49	1.46	9.76	0.98
RRP5	90S-C	1729	4.22	9.14	13.48	4.51
UTP22	90S-C	1237	5.66	9.7	13.1	5.09
RRP7	90S-C	297	5.72	9.43	12.79	4.04
ROK1	90S-C Hel	564	4.43	7.62	10.46	1.06
NSR1	90S-C=	414	0	0	9.66	1.69
MRD1	90S-C=	887	0	0	1.35	0
NOP9	90S-C=	666	0	0	1.5	0
EMG1	90S-3	252	19.44	19.05	21.43	10.71
NOP6	90S-3=	225	0	0	3.56	1.33
UTP30	90S-late	274	12.41	12.41	15.33	0
BMS1	90S-late	1183	8.37	9.38	10.4	4.56
RCL1	90S-late	367	7.08	11.17	13.08	5.45
KRE33	90S-late	1056	8.24	13.07	17.9	5.68
NOP14	90S-late	810	7.53	11.48	10.86	7.16
NOC4	90S-late	552	7.79	17.21	12.32	4.17
UTP20	90S-late	2493	4.49	6.18	9.31	3.69
UTP14	90S-late	899	6.23	12.24	11.01	3.11
ENP1	90S-late/pre40S	483	11.39	12.63	16.56	3.52
PNO1	90S-late/pre40S	274	8.76	10.95	12.04	4.01
RRP12	90S-late/pre40S	1228	3.66	7.82	10.5	3.99
RRT14	90S-late	206	9.22	8.25	8.25	2.43
FAF1	90S-late	346	3.76	5.49	4.91	1.16
ECM16	90S Hel	1267	0	6.31	7.89	3.16
RRP3	90S Hel	501	0	3.19	11.98	0.8
DBP8	90S Hel	431	0	3.71	7.66	0.46
PRP43	90S/60S Hel	767	0	0.26	10.69	0.26
DHR2	90S Hel	735	0	0	1.22	0
FAL1	90S Hel	399	0	0	1.25	0.25
MTR4	Exosome	1073	0	1.77	5.59	2.61
CSL4	Exosome	292	0	3.42	4.45	3.42
RRP4	Exosome	359	0	4.18	6.41	4.74
RRP40	Exosome	240	0	1.67	5	3.75
SKI6	Exosome	246	0	3.25	6.1	3.25
RRP42	Exosome	265	0	1.89	4.53	0.75
RRP43	Exosome	394	0	2.03	5.08	2.54
RRP45	Exosome	305	0	2.62	4.59	2.95
RRP46	Exosome	223	0	1.79	4.04	1.79
MTR3	Exosome	250	0	0.4	4.4	1.2
DIS3	Exosome	1001	0	2	5.39	3.8
RRP6	Exosome	733	0	2.05	5.18	3.55
LRP1	Exosome	184	0	5.98	9.24	1.09
POP1	RNase MRP	875	0	0.69	4.11	1.14
POP3	RNase MRP	195	0	1.03	5.13	0.51
POP4	RNase MRP	279	0	1.08	8.24	0
POP5	RNase MRP	173	0	2.89	1.16	1.16
POP6	RNase MRP	158	0	1.27	0.63	0
POP7	RNase MRP	140	0	0.71	3.57	0
POP8	RNase MRP	133	0	0.75	0	0
RPP1	RNase MRP	293	0	3.07	8.53	1.71
RMP1	RNase MRP	201	0	0.5	2.99	0.5
SNM1	RNase MRP	198	0	1.01	6.06	0
SGD1	90S-minor	899	0	2.22	6.23	0.67
CMS1	90S-minor	291	0.34	1.72	5.15	0.69
UTP25	90S-minor	721	0	0.42	3.47	0.83
RRP36	90S-minor	300	0	0	0.67	0
YGR251W	90S-minor	196	0	0	1.02	0
FYV7	90S-minor	151	0	0	0.66	0
PXR1	90S-minor	271	0	0	8.12	0
BUD23	90S-minor	275	0	0	0.36	0
SLX9	90S-minor	210	0	3.81	0.95	0.48
DIM1	pre40S	318	0	3.14	9.12	1.57
NOB1	pre40S	459	0	2.83	8.93	1.53
LTV1	pre40S	463	0	0	1.73	0
TSR1	pre40S	788	0	0	5.08	0.13
RIO2	pre40S	425	0	0	5.18	0
HRR25	pre40S	494	0	0	0.4	0
RPS0A	RPS	252	0.79	13.1	5.56	1.59
RPS1A	RPS	255	8.24	16.47	20	6.67
RPS2	RPS	254	0	0.79	9.45	3.15
RPS3	RPS	240	0.83	3.75	17.08	5
RPS4A	RPS	261	16.09	19.16	21.07	8.43
RPS5	RPS	225	10.67	13.78	18.22	7.11
RPS6A	RPS	236	8.05	10.17	19.49	8.47
RPS7A	RPS	190	10	12.11	18.42	5.79
RPS8A	RPS	200	6.5	10.5	11	7
RPS9A	RPS	197	11.17	20	16.41	7.69
RPS10A	RPS	105	0	0	0.95	0.95
RPS11A	RPS	156	5.77	7.05	14.1	5.77
RPS12	RPS	143	3.5	11.89	4.2	8.39
RPS13	RPS	151	5.3	11.92	3.97	5.3
RPS14A	RPS	137	10.87	13.14	0.73	6.57
RPS15	RPS	142	1.41	4.93	2.82	2.11
RPS16A	RPS	143	11.19	16.78	2.8	8.39
RPS17A	RPS	136	10.29	15.44	0.74	7.35
RPS18A	RPS	146	15.75	16.44	1.37	10.27
RPS19A	RPS	144	4.17	9.03	3.47	5.56
RPS20	RPS	121	0	1.65	10.74	4.96
RPS21A	RPS	87	0	0	0	3.45
RPS22A	RPS	130	6.92	13.08	1.54	6.92
RPS23A	RPS	145	1.38	4.14	4.14	4.14
RPS24A	RPS	135	8.15	14.81	0	2.96
RPS25A	RPS	108	1.85	7.41	0	5.56
RPS26A	RPS	119	1.68	1.68	0	2.52
RPS27A	RPS	82	1.22	1.22	0	0
RPS28A	RPS	67	5.97	0	0	5.97
RPS30A	RPS	63	0	6.35	0	0
RPS31	RPS	152	0	0.66	0	3.95
ASC1	RPS	319	0	0	11.91	4.08
RPL1A	RPL	217	0	1.38	13.36	2.3
RPL2A	RPL	254	3.54	3.15	14.17	2.76
RPL3	RPL	387	1.55	4.13	20.93	5.68
RPL4A	RPL	362	5.8	3.87	12.43	4.7
RPL5	RPL	297	0	2.69	13.47	1.68
RPL6A	RPL	176	3.98	3.41	17.61	2.84
RPL7A	RPL	244	4.92	3.28	20.08	4.92
RPL8A	RPL	256	1.95	12.89	16.02	6.64
RPL9A	RPL	191	0	1.57	8.38	2.62
RPL10	RPL	221	2.71	2.71	14.48	4.52
RPL11A	RPL	174	0.57	3.45	9.2	2.87
RPL12A	RPL	165	0	2.42	9.7	5.45
RPL13A	RPL	199	6.03	8.04	14.57	5.03
RPL14A	RPL	138	3.62	2.9	0.72	2.17
RPL15A	RPL	204	0	5.39	9.8	4.41
RPL16A	RPL	199	3.54	3.03	15.15	4.52
RPL17A	RPL	184	6.52	6.52	8.7	3.8
RPL18A	RPL	186	0	5.38	12.9	4.3
RPL19A	RPL	189	4.76	5.82	12.17	4.23
RPL20A	RPL	172	5.23	5.23	15.12	4.07
RPL21A	RPL	160	2.5	2.5	8.75	1.25
RPL22A	RPL	121	0	5.79	0	1.65
RPL23A	RPL	137	0	0.73	0.73	1.46
RPL24A	RPL	155	1.94	1.29	5.16	1.94
RPL25	RPL	142	1.41	1.41	4.23	1.41
RPL26A	RPL	127	2.36	11.81	0	3.15
RPL27A	RPL	136	1.47	5.88	1.47	5.15
RPL28	RPL	149	0.67	3.36	0.67	2.01
RPL29	RPL	59	0	0	0	1.69
RPL30	RPL	105	0	1.9	1.9	4.76
RPL31A	RPL	113	2.65	8.85	0	3.54
RPL32	RPL	130	3.85	6.15	0	3.85
RPL33A	RPL	107	1.87	1.87	0	0.93
RPL34A	RPL	121	0.83	0.83	0	1.65
RPL35A	RPL	120	7.5	5	0	3.33
RPL36A	RPL	100	8	7	0	6
RPL37A	RPL	88	3.41	4.55	0	1.14
RPL38	RPL	78	0	1.28	0	1.28
RPL42A	RPL	106	0	0	0	0.94
RPL43A	RPL	92	2.17	4.35	0	3.26
RPP0	RPL	312	0	1.6	8.97	1.6
RPP1A	RPL	106	0	1.89	0	0.94
RPP2A	RPL	106	0	1.82	0.94	1.82
RRP5	pre60S D1/90S	1729	4.22	9.14	13.48	4.51
NOC2	pre60S D1	710	0	3.66	8.45	0.42
MAK21	pre60S D1	1025	0	3.02	9.85	0.2
PWP1	pre60S D1	576	0	1.04	4.86	0.17
NOP12	pre60S D1	459	0	5.23	16.99	1.53
BRX1	pre60S D1	291	0	2.75	12.03	1.03
EBP2	pre60S D1	427	0	3.04	7.96	0.7
ERB1	pre60S D1	807	0	2.35	8.67	0.87
YTM1	pre60S D1	460	0	2.61	13.26	2.17
NOP7	pre60S D1	605	0	2.81	8.6	0.5
CIC1	pre60S D1	376	0	6.38	14.63	1.6
HAS1	pre60S D1	505	0.4	7.52	25.74	5.94
RLP7	pre60S D1	322	0	3.11	8.7	0.31
NOP15	pre60S D1	220	0	0.91	3.18	0
NOP16	pre60S D1	231	0	3.46	10.39	0
MRT4	pre60S D2	236	0	4.24	15.68	1.27
RPF1	pre60S D2	295	0	0.34	4.41	0.34
MAK16	pre60S D2	306	0	1.96	4.25	0
NSA1	pre60S D2	463	0	0	6.26	0
NOP4	pre60S D2	685	0	1.9	7.74	0.44
RRP1	pre60S D2	278	0	2.16	8.27	0.36
DRS1	pre60S D3	752	0	0	3.72	0.27
PUF6	pre60S D4	656	0	0.46	6.4	0
NIP7	pre60S D5	181	0	1.66	13.26	0
NOP2	pre60S D5	618	0	0.65	7.61	0.16
FPR3	pre60S D5	411	0	1.46	8.03	2.68
FPR4	pre60S D5	392	0	1.79	9.18	1.02
RPF2	pre60S D5	344	0	0.58	6.4	0
RRS1	pre60S D5	203	0	0	3.94	0
LOC1	pre60S D5	204	0	2.45	6.37	0
TIF6	pre60S D6	245	0	1.22	3.27	0
RLP24	pre60S D6	199	0	0.5	5.03	0
NOG1	pre60S D6	647	0	0	7.42	0
NOP53	pre60S D6	455	0	0	0.66	0
MAK11	pre60S	468	0	0.21	8.33	0
DBP10	pre60S	995	0	0	1.11	0
SSF1	pre60S	453	0	1.1	9.71	0.22
SSF2	pre60S	453	0	0	7.51	0
RRP15	pre60S	250	0	1.6	4.8	0
RRP14	pre60S	434	0	0	0.92	0
DBP9	pre60S	594	0	0.51	8.08	0
DBP7	pre60S	742	0	0	3.64	0
RRB1	pre60S	511	0	0	3.52	0.59
NUG1	pre60S	520	0	0	3.08	0
NSA2	pre60S	261	0	0	3.07	0
NOG2	pre60S	486	0	0	1.44	0
RIX1	pre60S	763	0	0	0.52	0
IPI1	pre60S	334	0	0.3	0.3	0
IPI3	pre60S	555	0	0	0.18	0
NOC3	pre60S	663	0	0	1.06	0
SPB1	pre60S	841	0	0	0.83	0
ARX1	pre60S	593	0	0	0.34	0
ALB1	pre60S	175	0	0	0.57	0
GRC3	pre60S	632	0	0	0.16	0
TMA16	pre60S	178	0	0	1.12	0
LSG1	pre60S	640	0	0	0.47	0
URB1	pre60S minor	1764	0	0.06	3.8	0.17
URB2	pre60S minor	1174	0	0	2.47	0
NOP8	pre60S minor	484	0	0	5.99	0
RSA3	pre60S minor	220	0	0	1.82	0
DBP6	pre60S minor	629	0	0	4.77	0
MAK5	pre60S minor	773	0	0.13	4.92	0.13
DBP2	pre60S minor	546	0	0	0.55	0
DBP3	pre60S minor	523	0	0	6.12	0
KEM1	pre60S minor	1528	0	0	3.08	0.26
RRP17	pre60S minor	235	0	0	0.43	0
REX4	pre60S minor	289	0	2.08	7.27	0
RRP8	pre60S minor	392	0	3.06	7.4	2.04
JIP5	pre60S minor	492	0	0	1.63	0
NOP13	pre60S minor	403	0	0.25	6.45	0.74
YIL096C	pre60S minor	336	0	0	0.89	0
